# Supplementary material for: Helicobacter pylori-induced gastric cancer is orchestrated by MRCKβ-mediated Siah2 phosphorylation
Source: PubMed Central journal article supplement (PMC7856738; doi:10.1186/s12929-021-00710-0), 2021-02-03
Supplement: 12929_2021_710_MOESM1_ESM.pdf [file 12929_2021_710_MOESM1_ESM.pdf]

## Supplementary Information

### *Helicobacter pylori*-induced gastric cancer is orchestrated by MRCK $\beta$ -mediated Siah2 phosphorylation

Pragyesh Dixit<sup>1</sup>, Shrikant B. Kokate<sup>1,†</sup>, Indrajit Poirah<sup>1</sup>, Debashish Chakraborty<sup>1</sup>, Duane T. Smoot<sup>2</sup>, Hassan Ashktorab<sup>3</sup>, Niranjan Rout<sup>4</sup>, Shivaram P. Singh<sup>5</sup>, Asima Bhattacharyya<sup>1,\*</sup>

**Affiliations:** <sup>1</sup>School of Biological Sciences, National Institute of Science Education and Research (NISER) Bhubaneswar, HBNI, P.O. Bhipur-Padanpur, Via Jatni, Dist. Khurda 752050, Odisha, India. <sup>2</sup>Department of Medicine, Meharry Medical Center, Nashville, TN 37208, USA. <sup>3</sup>Department of Medicine, Howard University, Washington, DC 20060, USA. <sup>4</sup>Department of Pathology, Acharya Harihar Post Graduate Institute of Cancer, Cuttack 753007, Odisha, India. <sup>5</sup>Department of Gastroenterology, SCB Medical College, Cuttack 753007, Odisha, India.

**Current affiliation:** <sup>†</sup>Institute of Biotechnology, University of Helsinki, P.O. Box 56, 0014, Helsinki, Finland.

**Correspondence:** \*School of Biological Sciences, National Institute of Science Education and Research (NISER), HBNI, P.O. Bhipur-Padanpur, Via Jatni, Dist. Khurda 752050, Odisha, India. Tel: +91-674-2494210, e-mail: asima@niser.ac.in

**>SIAH2**

MSRPSSTGPSANKPCSKQPPQPQHTPSAAPPAAATISAAGPGSSAVPAAAAVISGPG  
GGGGAGPVSPQHHELTSLFECPVCFDYVLPPIQCQAGHLVCNQCRCQLSCCPTCRGA  
LTPSIRNLAMEKVASAVLFPCKYATTGCSLTLHHTEKPEHEDICEYRPYSCPCPGASCKW  
QGSLEAVMSHLMHAHKSITTLQGEDIVFLATDINLPGAVDWMMQSCFGHHFMLVLEKQ  
EKYEGHQFFAIVLLIGTRKQAEFAYRLELNGNRRRLTWEATPRSIHDGVAAAIMNSDC  
LVFDTAIAHLFADNGNLGINVTISTCCP

**>MRCKβ**

MSAKVRLKKLEQLLLDGPWRNESALSVETLLDVLVCLYTECSHSALRRDKYVAEFLEWA  
KPFTQLVKEMQLHREDFEIIKVIKRGAFGEVAVVKMKNTERIYAMKILNKWEMLKRAETA  
CFREERDVLVNGDCQWITALHYAFQDENHLYLVMDYYVGGDLLTLLSKFEDKLPEDMAR  
FYIGEMVLAIDSIHQLHYVHRDIKPDNVLLDVNGHIRLADFGSCLKMNDGTVQSSVAVG  
TPDYISPEILQAMEDGMGKYGPECDWWSLGVCMYEMLYGETPFYAESLVETYGKIMNH  
EERFQFPSHVTVDVSEEAKDLIQRILCSRRRLGQNGIEDFKKHAFFEGLNWNENIRNLEAP  
YIPDVSSPSDTSNFDVDDDDVLRNTEILPPGSHTGFSGLHLPFIGFTFTTESCFSDRGSLK  
SIMQSNTLTKDEDVQRDLEHSLQMEAYERRIRLEQEKLELSRKLQESTQTVQSLHGSS  
RALSNSNRDKEIKLNEEIERLKNKIADSNRLERQLEDTVALRQEREDSTQRLRGLEKQH  
RVVRQEKEELHKQLVEASERLKSQAKELKDAHQQRKLALQEFSELNERMAELRAQKQK  
VSRQLRDKEEEMEVATQKVDAMRQEMRRAEKLKRELEAQLDDAVAEASKERKLREHSE  
NFCKQMESELEALKVKQGGRGAGATLEHQQEISKIKSELEKKVLFYEEELVRREASHVL  
EVKNVKKEVHDESHQLALQKEILMLKDKLEKSKRERHNEMEEAVGTIKDKYERERAML  
FDENKKLTAENEKLCFVDKLTQAQRQLEDELQDLAAKESVAHWEAQIAEIIQWVSDEK  
DARGYLQALASKMTEELEALRSSSLGSRRLDPLWKVRRSQKLDMSARLELQSALEAEIR  
AKQLVQEELRKVKDANLTLESKLDSEAKNRELLEEMEILKKKMEEKFRADTGLKLPDFQ  
DSIFEYFNTAPLAHDLTFRSSASEQETQAPKPEASPSMSVAASEQQEDMARPPQRPSA  
VPLPTTQALALAGPKPKAHQFSIKSFSSPTQCSHCTSLMVGLIRQGYACEVCSFACHVS  
CKDGAPQVCPIPPEQSKRPLGVDVQRGIGTAYKGHVKVPKPTGVKKGWQRAYAVVDCD  
KLFLYDLPEGKSTQPGVIASQVLDLRDDEFSSVSLASDVIAHATRRDIPCIFRVTASLLGA  
PSKTSSLLILTENENEKRKWWGILEGLQSILHKNRLRNQVVHVPLEAYDSSLPLIKAILTAAI  
VDADRIAVGLEEGLYVIEVTRDVIVRAADCKKVHQIELAPREKIVILLCGRNHHVHLYPWS  
SLDGAEGSFDIKLPETKGCQLMATATLKRNSGTCLFVAVKRLILCYEIQRTPFHRKFNEI  
VAPGSVQCLAVLRDRLCVGYPSGFCLLSIQGDGQPLNLVNPNDPSLAFLSQQSFDALCA  
VELESEEYLLCFSHMGLYVDPQGRRARAEQELMWPAAPVACSCSPTHVTYSEYGVDFV  
DVRTMWWQTIGLRRIRPLNSEGLNLLNCEPPRLIYFKSKFSGAVLNVPDTSNKKQML  
RTRSKRRFVFKVPEEERLQQRREMLRDPPELRSKMISNPTNFNHVAHMGPGDGMQVLM  
DLPLSAVPPSQEERPGPAPTNLARQPPSRNKPYISWPSSGGSEPSVTVPLRSMSDPDQ  
DFDKEPDSSTKHSTPSNSSNPSGPPSPNSPHRSQPLEGLEQPACDT

-----Predicted interaction result of the 1st two proteins:-----

-----  
The probability for interacting of the 1st two proteins: **0.9943**

The probability for non-interacting of the 1st two proteins: **0.0057**

Decision: **SIAH2 and MRCKB can interact**  
-----

**Fig. S1. Result of LR\_PPI analysis showing the probability of Siah2-MRCKβ interaction.**

**A**

| Siah2 sites             | Predicted score |
|-------------------------|-----------------|
| <u>S</u> <sup>6</sup>   | 0.996           |
| <u>T</u> <sup>275</sup> | 0.986           |
| <u>T</u> <sup>279</sup> | 0.931           |
| <u>S</u> <sup>282</sup> | 0.992           |

**B**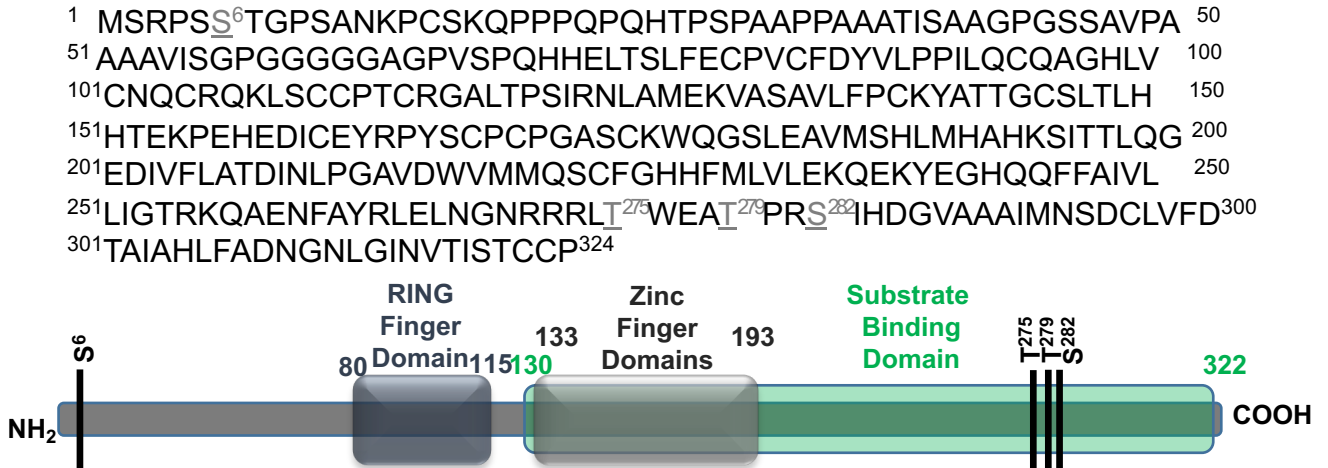

**Fig. S2. Identification of novel phosphorylatable residues.** (A) Novel Siah2 phosphorylatable residues along with their predicted scores as identified using NetPhos 3.0. (B) Sequence and multi-domain schematic depiction of human Siah2 protein. Identified highly probable phosphorylatable amino acids are underlined in the sequence and represented by vertical lines in the domain structure.

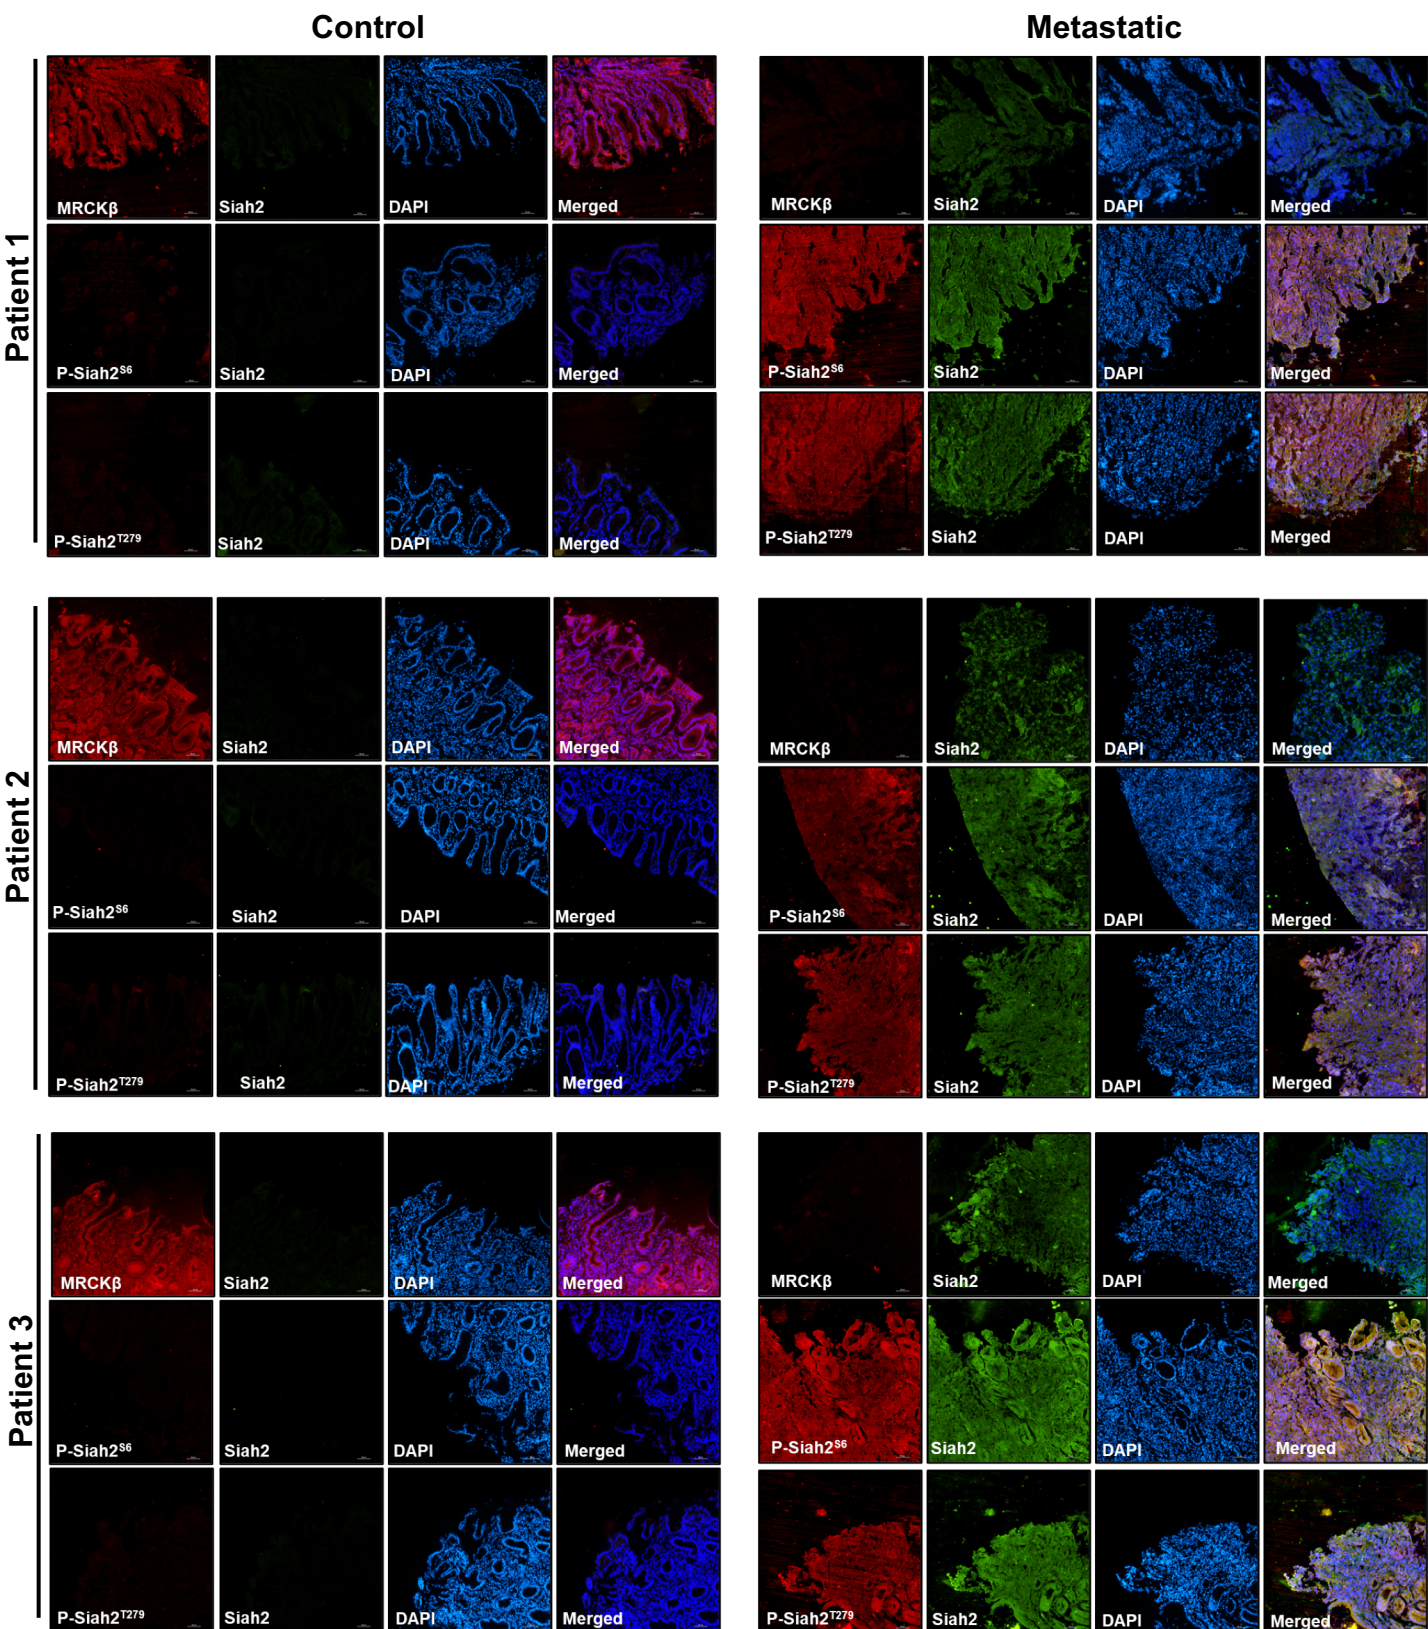

**Fig. S3i. Human gastric biopsy tissues exhibit enhanced Siah2 phosphorylation and MRCKβ downregulation.** Immunofluorescence microscopy images showing the status of Siah2, P-S<sup>6</sup>-Siah2, P-T<sup>279</sup>-Siah2 and MRCKβ in Patient #1-3. Objective: 20X and scale bar represents 50 μm.

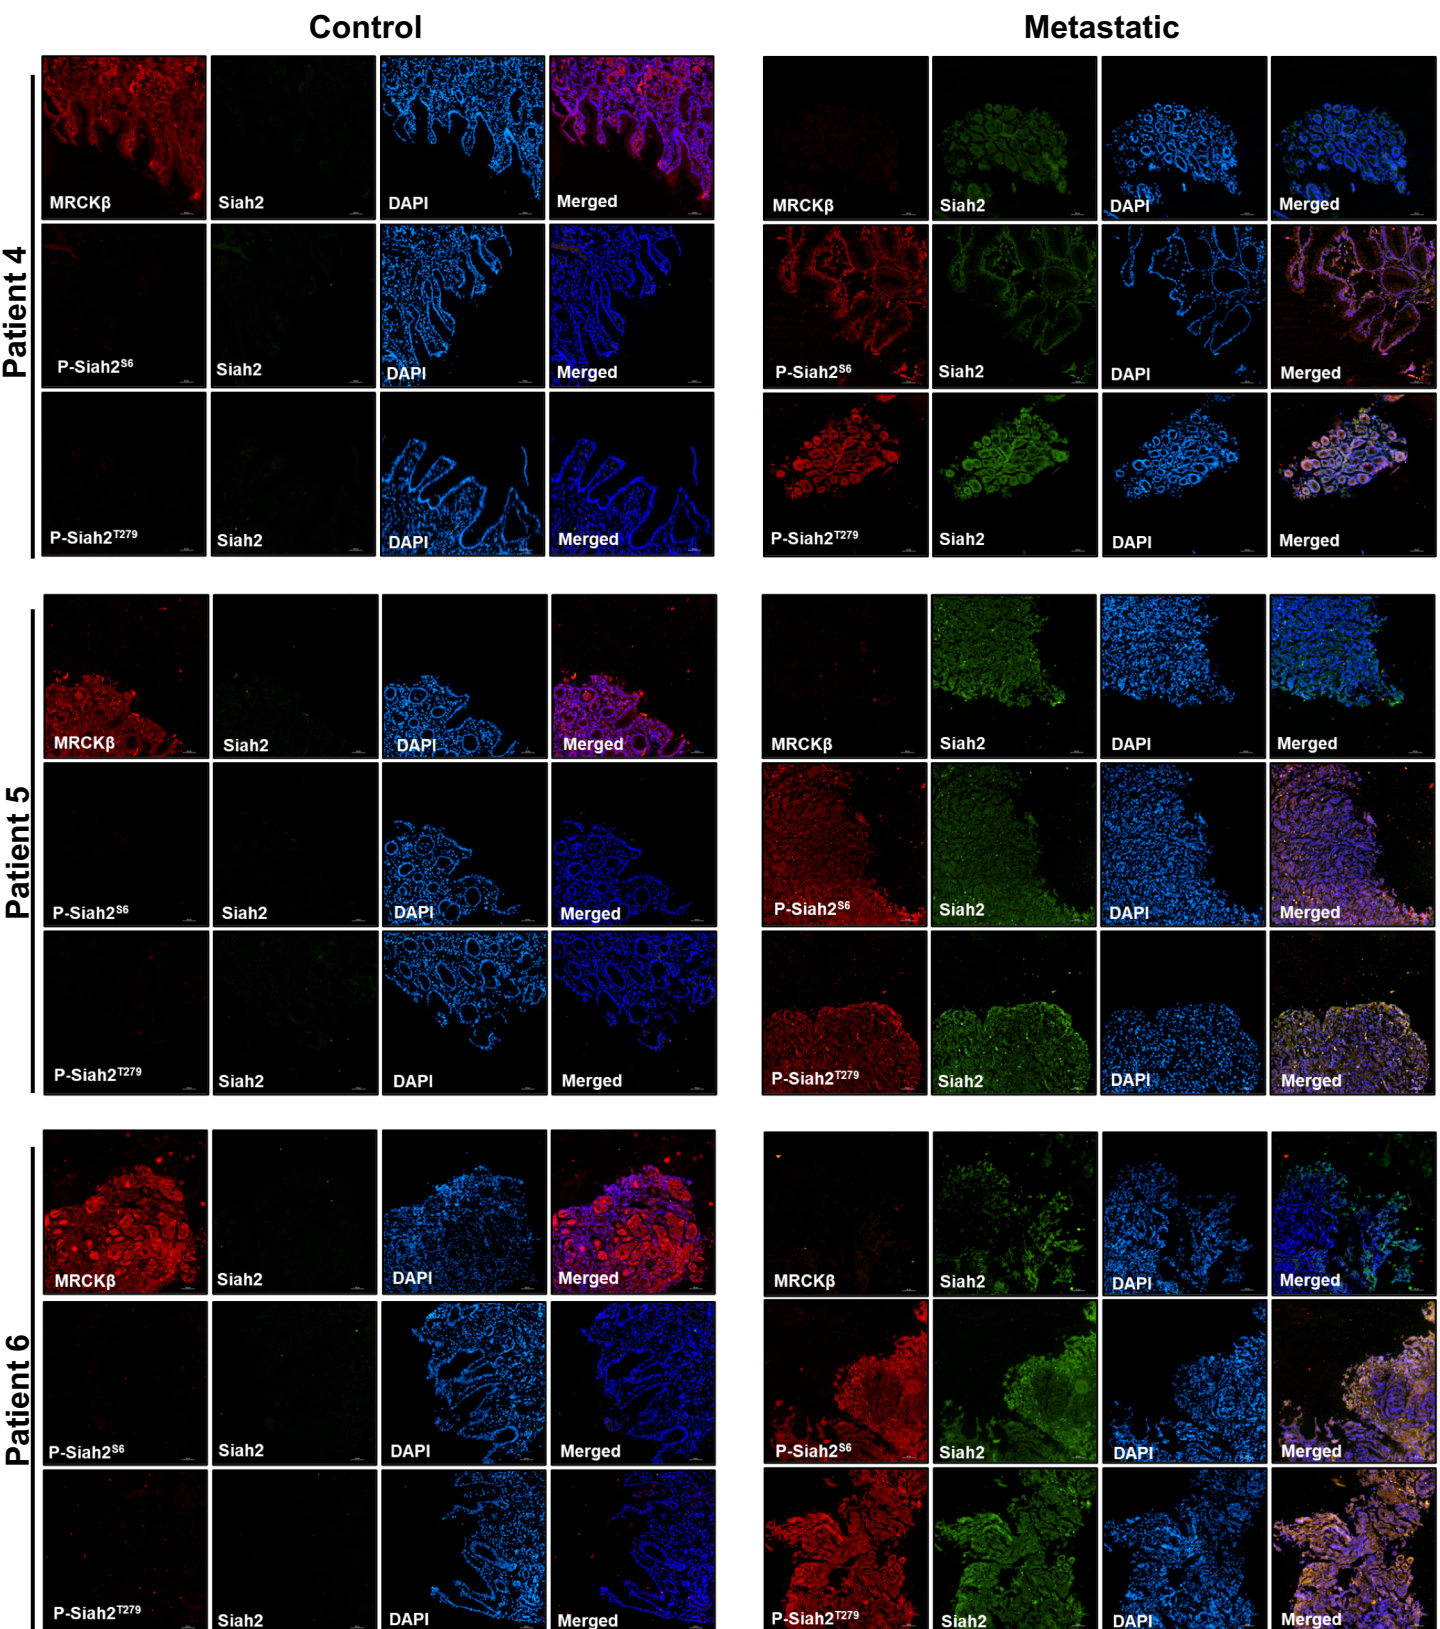

**Fig. S3ii. Human gastric biopsy tissues exhibit enhanced Siah2 phosphorylation and MRCK $\beta$  downregulation.** Immunofluorescence microscopy images showing the status of Siah2, P-S<sup>6</sup>-Siah2, P-T<sup>279</sup>-Siah2 and MRCK $\beta$  in Patient #4-6. Objective: 20X and scale bar represents 50  $\mu$ m.

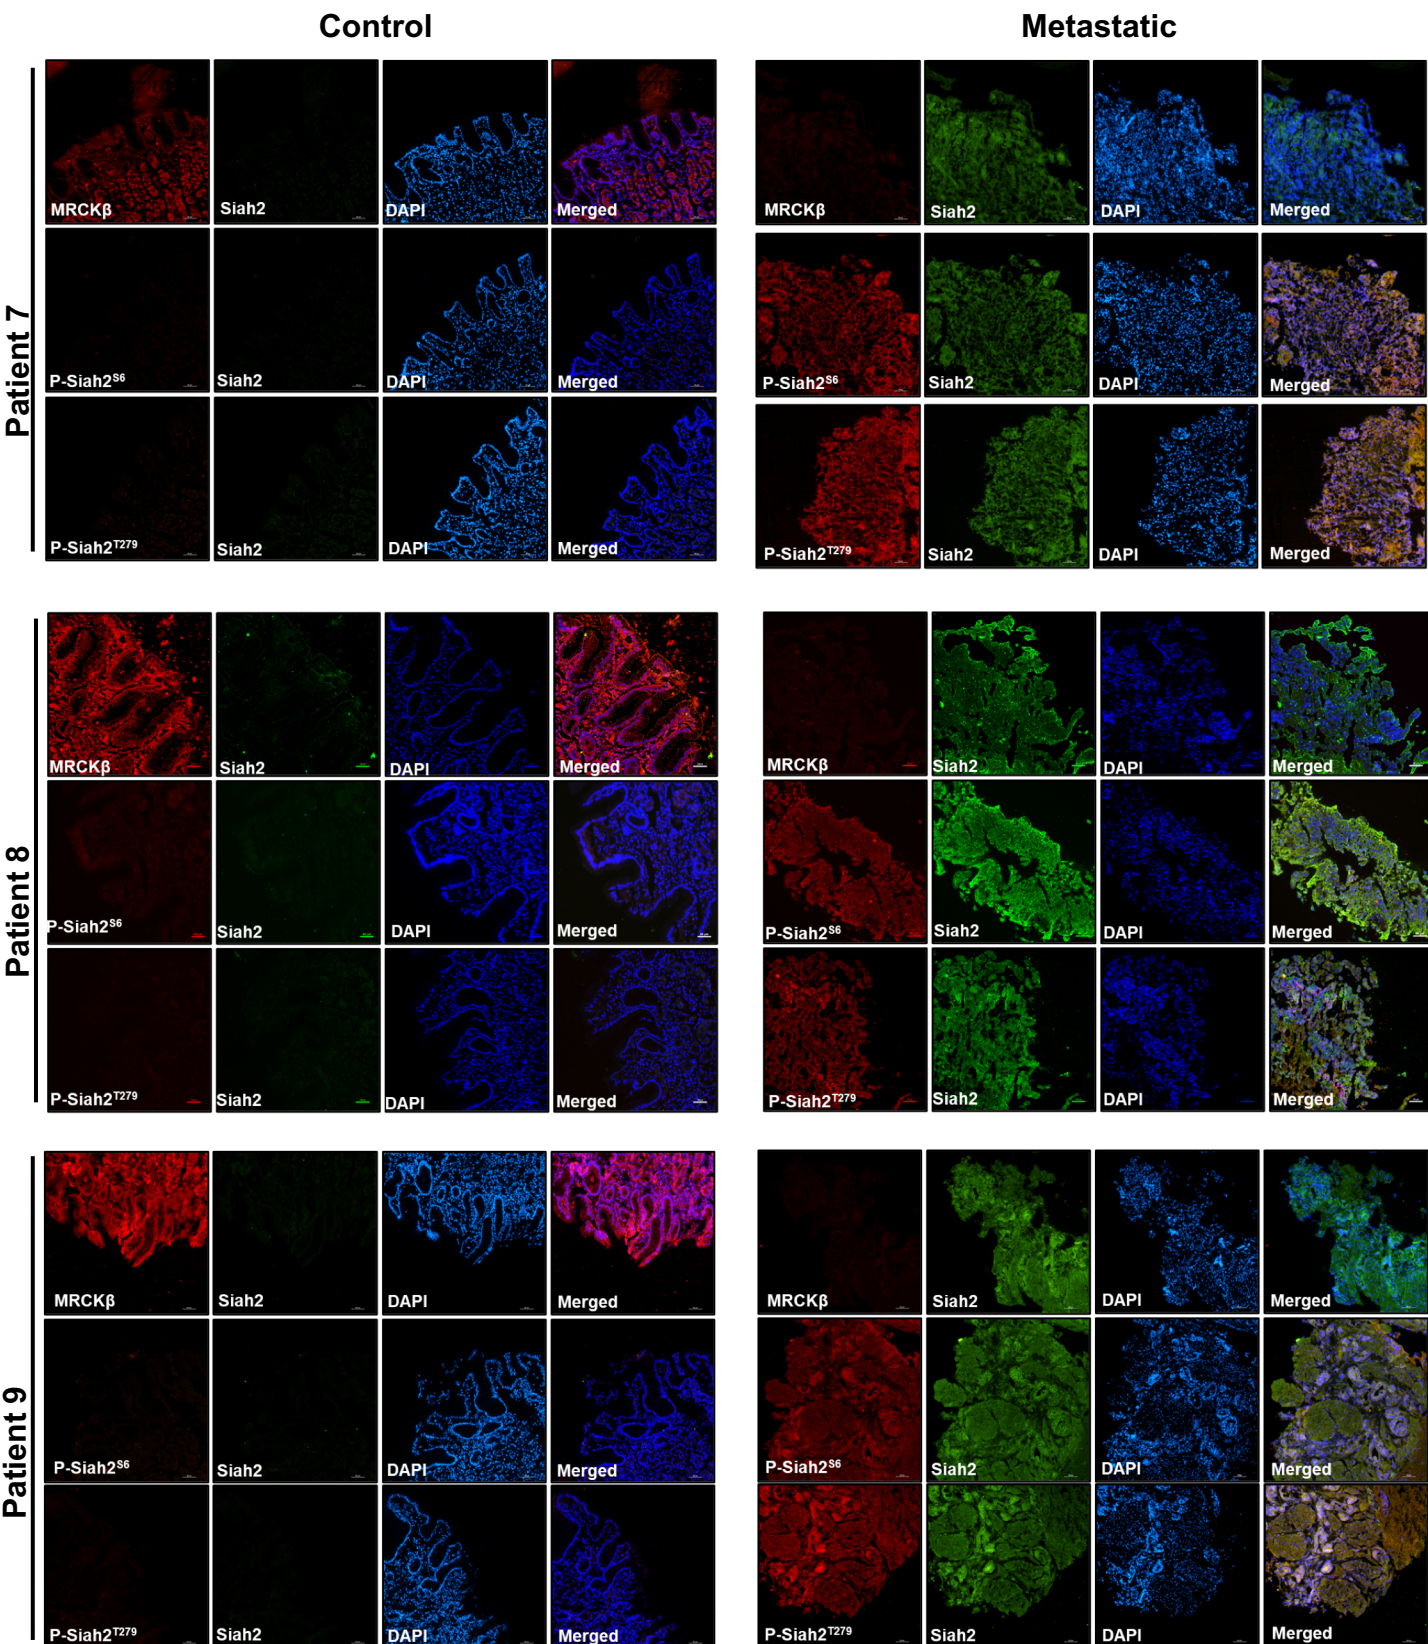

**Fig. S3iii. Human gastric biopsy tissues exhibit enhanced Siah2 phosphorylation and MRCK $\beta$  downregulation.** Immunofluorescence microscopy images showing the status of Siah2, P-S<sup>6</sup>-Siah2, P-T<sup>279</sup>-Siah2 and MRCK $\beta$  in Patient #7-9. Objective: 20X and scale bar represents 50  $\mu$ m.

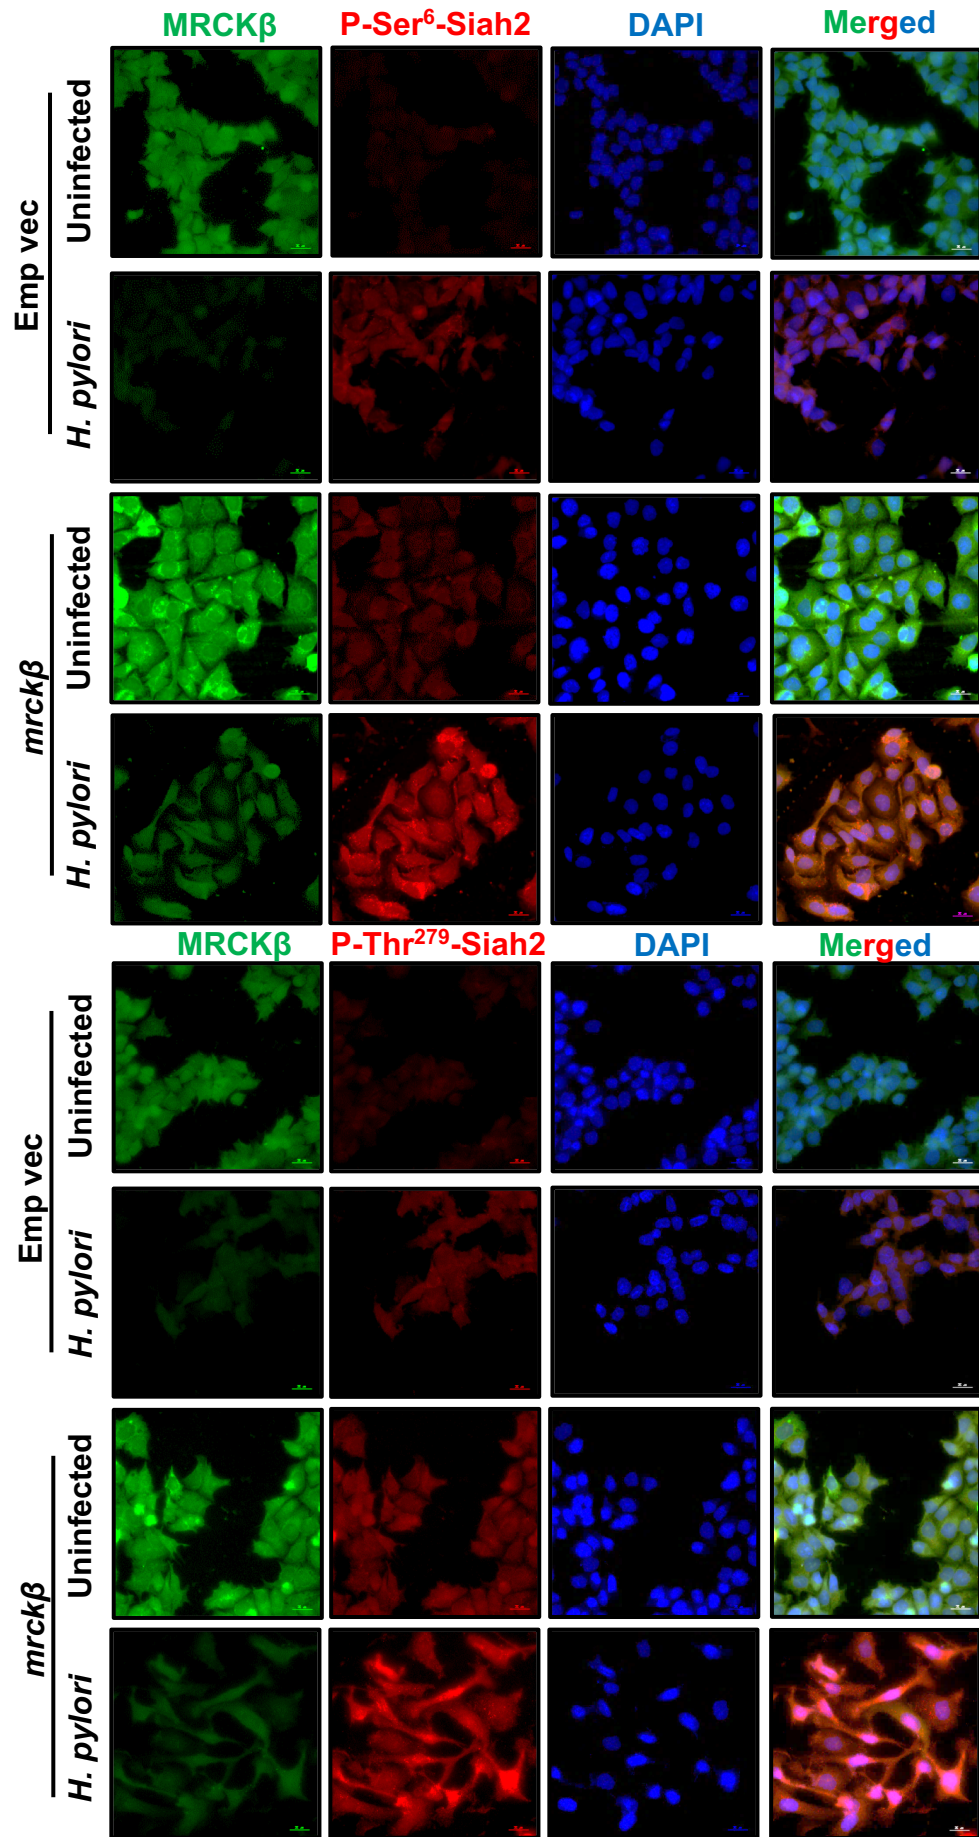

**Fig. S4. Phosphorylated Siah2 is enhanced upon *mrckβ* overexpression.** Immunofluorescence microscopy images of AGS cells overexpressing the empty vector or *mrckβ* and infected with 200 MOI *H. pylori* for 12 h showing enhanced P-S<sup>6</sup>-Siah2 and P-T<sup>279</sup>-Siah2. Objective: 60X and scale bar represents 20  $\mu$ m.
